# Supplementary material for: Recyclable indium catalysts for additions of 1,3-dicarbonyl compounds to unactivated alkynes affected by structure and acid strength of solid supports
Source: Royal Society of Chemistry journal article supplement (doi:10.1039/b810490e), 2008-01-01
Supplement: b810490e.pdf [file b810490e.pdf]

## Supplementary Information

### Recyclable Indium Catalysts for Additions of 1,3-Dicarbonyl Compounds to Unactivated Alkynes Affected by Structure and Acid Strength of Solid Supports

Kiyotomi Kaneda,<sup>1\*</sup> Ken Motokura,<sup>2</sup> Nobuaki Nakagiri,<sup>2</sup> Tomoo Mizugaki,<sup>2</sup> Koichiro Jitsukawa<sup>2</sup>

<sup>1</sup> *Research Center for Solar Energy Chemistry, Osaka University,*

<sup>2</sup> *Department of Materials Engineering Science, Graduate School of Engineering Science,*

*Osaka University, 1-3 Machikaneyama, Toyonaka, Osaka 560-8531, Japan*

#### Contents

|                                                                                          |           |
|------------------------------------------------------------------------------------------|-----------|
| <b>Reaction with Deuterated Phenylacetylene</b>                                          | <b>2S</b> |
| <b>XRD spectra of In<sup>3+</sup>-USY and In<sup>3+</sup>-mont</b>                       | <b>3S</b> |
| <b>XANES spectra of In<sup>3+</sup>-USY and In<sup>3+</sup>-mont</b>                     | <b>4S</b> |
| <b>EXAFS spectra of In<sup>3+</sup>-USY and In<sup>3+</sup>-mont</b>                     | <b>5S</b> |
| <b>FT-IR spectra of adsorbed acetylacetone and pyridine on In<sup>3+</sup> catalysts</b> | <b>6S</b> |

**Reaction with Deuterated Phenylacetylene:** Into a pyrex pressure tube (15 mL) were placed the  $\text{In}^{3+}$ -USY ( $5.0 \times 10^{-2}$  g,  $\text{In}$ :  $1.2 \times 10^{-2}$  mmol), ethyl cyclopentanone-2-carboxylate (1.0 mmol), and 1-deuterio-2-phenylethyne (2.0 mmol). The resulting mixture was vigorously stirred at 100 °C under Ar. After 12 h, the catalyst was separated by filtration and  $^1\text{H}$  NMR analysis revealed 14% yield of the addition product. The ratios of deuterium at *cis/trans*-position of product and deuterium incorporation to the dicarbonyl substrate were also determined by  $^1\text{H}$  NMR.

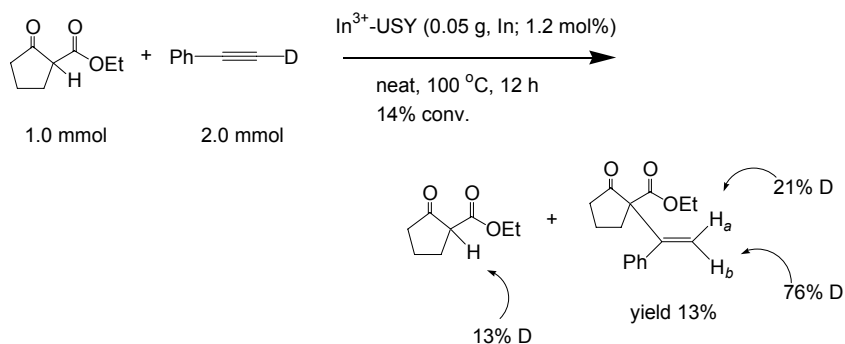

## XRD

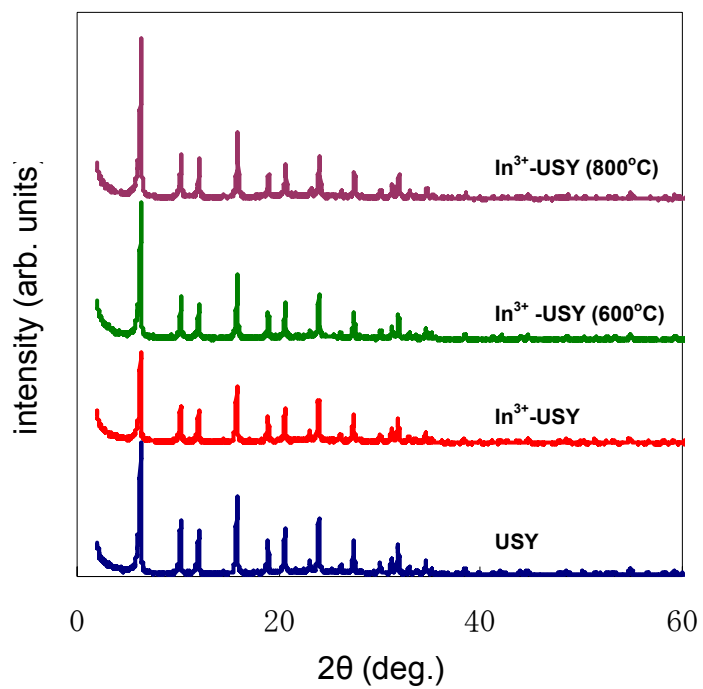

**Figure 1S.** XRD patterns of  $\text{In}^{3+}$ -USY samples and USY.

## XAFS

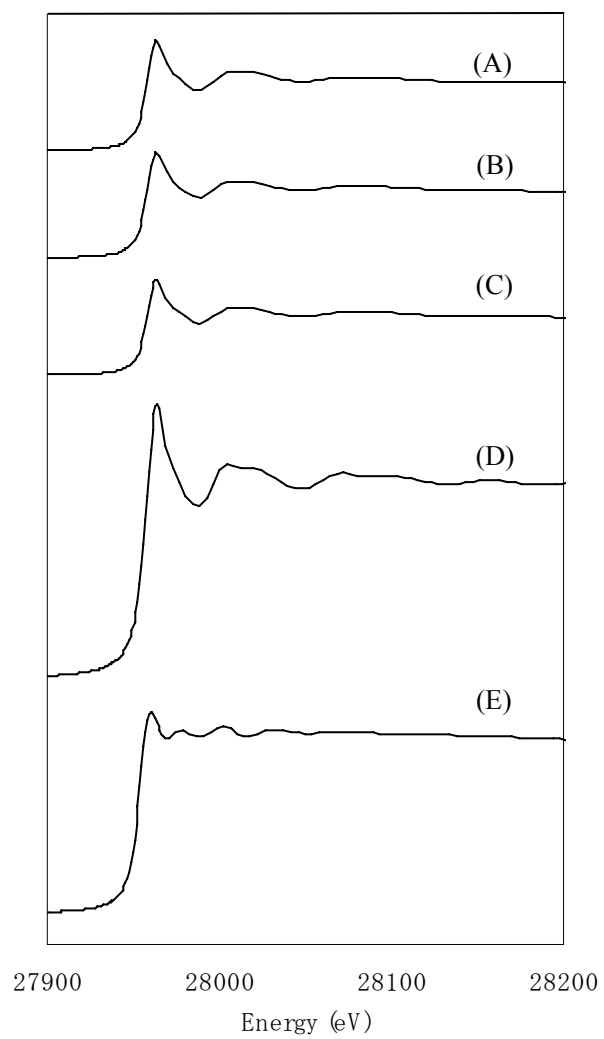

**Figure 2S.** In K-edge XANES spectra for (A) used In<sup>3+</sup>-USY calcined at 800 °C, (B) used In<sup>3+</sup>-USY, (C) fresh In<sup>3+</sup>-USY, (D) In<sub>2</sub>O<sub>3</sub>, and (E) In foil.

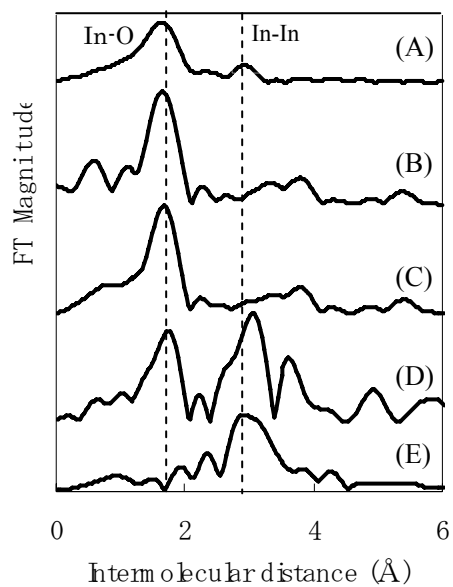

**Figure 3S.** In K-edge FT-EXAFS spectra for (A) used  $\text{In}^{3+}$ -USY calcined at 800 °C, (B) used  $\text{In}^{3+}$ -USY, (C) fresh  $\text{In}^{3+}$ -USY, (D)  $\text{In}_2\text{O}_3$ , and (E) In foil.

## FT-IR

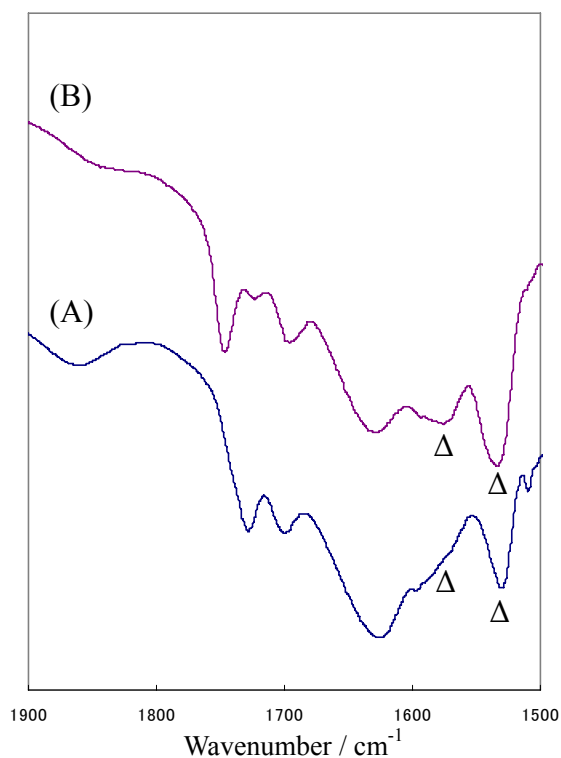

**Figure 4S.** FT-IR spectra for (A)  $\text{In}^{3+}$ -USY treated with acetyl acetone and (B)  $\text{In}^{3+}$ -mont treated with acetyl acetone.  $\Delta$ : enolate species.

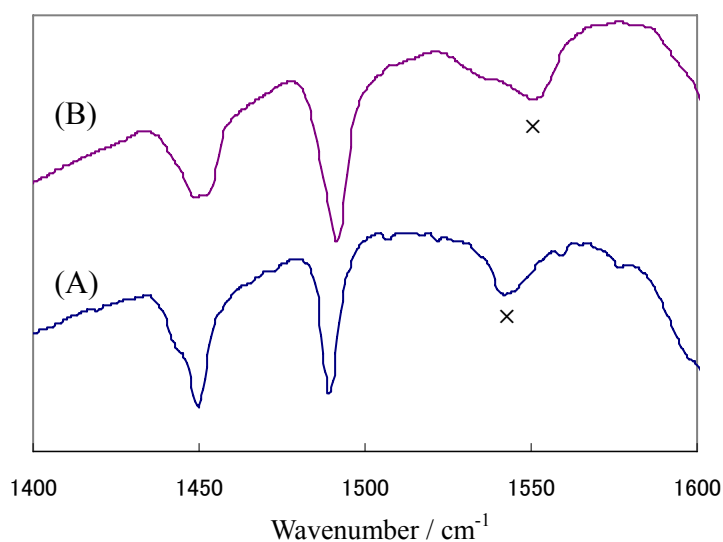

**Figure 5S.** FT-IR spectra for (A)  $\text{In}^{3+}$ -USY treated with pyridine and (B)  $\text{In}^{3+}$ -mont treated with pyridine.  $\times$ : Lewis acid site. After the adsorption of pyridine, the excess and weakly adsorbed pyridine was removed by evacuating the samples at 150 °C for 12 h. The IR spectra of the strongly adsorbed pyridine were obtained with self-supporting wafers.
